# Supplementary material for: Micronutrient availability in ferruginous, silica-rich Precambrian oceans
Source: Research Square preprint supplement (doi:10.21203/rs.3.rs-2312236/v1), 2023-01-10
Supplement: Supplementary file 1 [file 9ba38639ba44dc1ccd8696c5.xlsx]

## Sheet: All solution data
	Solution label	Cd (µmolKg-1)	Co (µmolKg-1)	Cu (µmolKg-1)	Fe (mmolKg-1)	Mn (µmolKg-1)	Mo (µmolKg-1)	Ni (µmolKg-1)	V (µmolKg-1)	Si (mmolKg-1)	Zn (µmolKg-1)	Time elapsed (hours)	Starting conditions for each experiments outlines in bold boxes
All ICP-OES data from solution samples throughout greenalite synthesis experiments	I1	8.8968	16.9693	14.9489	0.865712	18.2017	10.4232	17.0387	17.6678	0.683517	14.5238	0	I	Multi TM		Experiment name	TM present
	I2	8.8968	16.9693	14.1621	0.837064	18.2017	10.4232	17.0387	14.7232	0.676397	12.995	0.25	pH	8		buffered pH	pH units
	I3	8.8968	16.9693	14.1621	0.829006	18.2017	10.4232	17.0387	12.7601	0.676397	12.2305	1	TM	1		Initial trace metal concentration	ppm
	I4	8.8968	16.9693	14.1621	0.815577	18.2017	10.4232	17.0387	9.81547	0.669277	11.4661	2.5	SiO2	40		Initial SiO2 (aq)	ppm
	I5	8.8968	16.9693	14.1621	0.811101	18.2017	10.4232	17.0387	8.83392	0.665717	10.7017	8.08333
	I6	8.8968	16.9693	14.1621	0.812892	18.2017	10.4232	17.0387	6.87083	0.667497	10.7017	19.8333
	I7	8.8968	16.9693	14.1621	0.804834	18.2017	10.4232	17.0387	5.88928	0.667497	10.7017	23.8333
	I8	8.8968	16.9693	14.1621	0.811101	18.2017	10.4232	17.0387	5.88928	0.667497	10.7017	28.3333
	I9	8.8968	16.9693	14.1621	0.811101	18.2017	10.4232	17.0387	4.90773	0.663937	10.7017	47.3333
	I10	8.8968	16.9693	13.3753	0.808415	18.2017	10.4232	17.0387	4.90773	0.663937	9.93732	77.3333
	I11	8.8968	16.9693	11.0149	0.801253	18.2017	10.4232	17.0387	3.92619	0.656817	9.93732	121.833
	I12	8.8968	16.9693	7.86782	0.884512	18.2017	10.4232	17.0387	3.92619	0.622998	10.7017	195.333
	I13	8.8968	16.9693	5.50747	0.795882	18.2017	10.4232	17.0387	2.94464	0.658597	8.4085	288.833
	I14	8.8968	16.9693	5.50747	0.787825	18.2017	10.4232	17.0387	1.96309	0.651477	8.4085	315.833
	I15	8.8968	16.9693	3.93391	0.925694	18.2017	10.4232	17.0387	1.96309	0.624778	8.4085	364.833
	I16	8.8968	16.1208	0.786782	0.899731	18.2017	10.4232	17.0387	0.981547	0.594518	6.87968	436.833
	I17	8.8968	15.2724	0	0.832587	18.2017	10.4232	17.0387	0.981547	0.525098	5.35086	1006.33
	I18	8.45196	11.8785	0	0.61504	18.2017	10.4232	13.6309	0	0.290139	2.29323	1292.33
	I19	8.45196	11.03	0	0.57744	18.2017	10.4232	12.779	0	0.245639	1.52882	1320
	I20	8.45196	11.03	0	0.56222	18.2017	10.4232	11.9271	0	0.231399	0.764409	1364.33
	I21	8.45196	10.1816	0	0.556849	18.2017	10.4232	12.779	0	0.218939	1.52882	1512.17
	I22	8.45196	10.1816	0	0.544315	18.2017	10.4232	11.9271	0	0.215379	1.52882	1634.67
	I23	8.45196	10.1816	0	0.529096	18.2017	10.4232	11.9271	0	0.206479	1.52882	1804.33
	I24	8.45196	9.33311	0	0.512086	17.2916	9.90202	11.0751	0	0.201139	1.52882	2042.33
	I25	8.45196	9.33311	0	0.504029	18.2017	10.4232	11.0751	0	0.188679	1.52882	2377.33
	I26	8.45196	9.33311	0	0.489705	17.2916	9.90202	11.0751	0	0.181559	1.52882	2665.83
	If	7.56228	9.19681	0	0.452104	15.4714	9.38086	8.51934	0	0.275899	0.764409	3361.8
	J1	4.4484	8.48464	7.08104	0.959714	9.10084	5.21159	8.51934	8.83392	0.671057	7.64409	0	J	Multi TM
	J2	4.4484	8.48464	7.08104	0.834378	9.10084	5.21159	8.51934	7.85238	0.672837	6.87968	0.25	pH	8
	J3	4.4484	8.48464	7.08104	0.826321	9.10084	5.21159	8.51934	6.87083	0.669277	6.11527	1	TM	0.5
	J4	4.4484	8.48464	7.08104	0.828111	9.10084	5.21159	8.51934	5.88928	0.665717	6.11527	2.5	SiO2	40
	J5	4.4484	8.48464	7.08104	0.821844	9.10084	5.21159	8.51934	5.88928	0.663937	6.11527	8.08333
	J6	4.4484	8.48464	7.08104	0.814682	9.10084	5.21159	8.51934	3.92619	0.656817	5.35086	19.8333
	J7	4.4484	8.48464	7.08104	0.820949	9.10084	5.21159	8.51934	3.92619	0.663937	5.35086	23.8333
	J8	4.4484	8.48464	7.08104	0.822739	9.10084	5.21159	8.51934	3.92619	0.667497	5.35086	28.3333
	J9	4.4484	8.48464	7.08104	0.82453	9.10084	5.21159	8.51934	3.92619	0.667497	5.35086	47.3333
	J10	4.4484	8.48464	7.08104	0.820949	9.10084	5.21159	8.51934	2.94464	0.663937	5.35086	77.3333
	J11	4.4484	8.48464	7.08104	0.820054	9.10084	5.21159	8.51934	2.94464	0.662157	5.35086	121.833
	J12	4.4484	8.48464	6.29426	0.916741	9.10084	5.21159	8.51934	1.96309	0.630117	6.11527	195.333
	J13	4.4484	8.48464	4.72069	0.813787	9.10084	5.21159	8.51934	1.96309	0.658597	5.35086	288.833
	J14	4.4484	8.48464	3.93391	0.808415	9.10084	5.21159	8.51934	1.96309	0.658597	5.35086	315.833
	J15	4.4484	8.48464	3.14713	0.952551	9.10084	5.21159	8.51934	0.981547	0.633677	5.35086	364.833
	J16	4.4484	7.63618	0	0.884512	9.10084	5.21159	8.51934	0	0.571378	3.82205	436.833
	J17	4.4484	7.63618	0	0.839749	9.10084	5.21159	7.66741	0	0.517978	2.29323	1006.33
	J18	4.4484	6.78771	0	0.673232	9.10084	5.21159	7.66741	0	0.325739	0.764409	1292.33
	J19	4.4484	5.93925	0	0.653536	9.10084	5.21159	6.81547	0	0.293699	1.52882	1320
	J20	4.4484	5.93925	0	0.633841	9.10084	5.21159	6.81547	0	0.272339	0.764409	1364.33
	J21	4.4484	5.93925	0	0.624888	9.10084	5.21159	6.81547	0	0.258099	1.52882	1512.17
	J22	4.4484	5.93925	0	0.61325	9.10084	5.21159	6.81547	0	0.256319	1.52882	1634.67
	J23	4.00356	5.93925	0	0.583706	9.10084	5.21159	6.81547	0	0.234959	0.764409	1804.33
	J24	4.00356	5.09079	0	0.576544	9.10084	5.21159	6.81547	0	0.236739	0.764409	2042.33
	J25	4.4484	5.09079	0	0.566697	9.10084	5.21159	6.81547	0	0.227839	0.764409	2377.33
	J26	4.00356	5.09079	0	0.552372	9.10084	5.21159	5.96354	0	0.213599	1.52882	2665.83
	Jf	4.00356	5.10934	0	0.5094	8.19075	4.69043	5.96354	0	0.318619	1.52882	3361.8
	K1	7.56228	14.4239	14.1621	1.18353	15.4714	10.4232	15.3348	17.6678	0.973656	14.5238	0	K	Multi TM
	K2	7.56228	14.4239	14.1621	0.992838	15.4714	10.4232	14.4829	0	0.936276	1.52882	0.25	pH	8.5
	K3	7.56228	13.5754	5.50747	0.695613	15.4714	10.4232	14.4829	0	0.872197	0	1	TM	1
	K4	7.11744	11.8785	0	0.611459	15.4714	10.4232	13.6309	0	0.774297	0	2.5	SiO2	60
	K5	7.11744	11.03	0	0.556849	15.4714	10.4232	13.6309	0	0.690637	0	8.08333
	K6	6.6726	10.1816	0	0.452104	14.5613	10.4232	12.779	0	0.544678	0	19.8333
	K7	6.6726	9.33311	0	0.429722	14.5613	10.4232	12.779	0	0.510858	0	23.8333
	K8	6.6726	9.33311	0	0.410922	14.5613	10.4232	12.779	0	0.482378	0	28.3333
	K9	6.6726	8.48464	0	0.359893	14.5613	10.4232	11.9271	0	0.405838	0	47.3333
	K10	6.6726	7.63618	0	0.305282	14.5613	10.4232	11.0751	0	0.325739	0	77.3333
	K11	6.22776	5.93925	0	0.275739	13.6513	10.4232	10.2232	0	0.256319	0	121.833
	K12	7.11744	5.09079	0	0.220233	14.5613	10.4232	10.2232	0	0.131719	0	195.333
	K13	6.22776	4.24232	0	0.161146	13.6513	10.4232	7.66741	0	0.140619	0	288.833
	K14	6.22776	3.39386	0	0.153984	13.6513	10.4232	7.66741	0	0.135279	0	315.833
	K17	7.11744	3.39386	0	0.144136	15.4714	10.4232	7.66741	0	0.0462798	0	1006.33
	K18	7.11744	2.54539	0	0.108326	14.5613	10.4232	5.96354	0	0.01246	0	1292.33
	K19	6.6726	2.54539	0	0.100269	14.5613	10.4232	5.96354	0	0.00533998	0	1320
	K20	6.6726	2.54539	0	0.0993733	14.5613	10.4232	5.96354	0	0.00177999	0	1364.33
	K21	7.11744	1.69693	0	0.0957923	14.5613	10.4232	5.1116	0	-0.00177999	0	1512
	L1	4.00356	7.63618	7.08104	0.825425	8.19075	5.21159	6.81547	8.83392	0.977216	6.87968	0	L	Multi TM
	L2	3.55872	6.78771	7.08104	0.777081	8.19075	5.21159	6.81547	0	0.952296	0	0.25	pH	8.5
	L3	3.55872	6.78771	1.57356	0.699194	8.19075	5.21159	7.66741	0	0.882876	0	1	TM	0.5
	L4	3.55872	5.93925	0	0.637422	8.19075	5.21159	7.66741	0	0.804557	0	2.5	SiO2	60
	L5	3.55872	5.93925	0	0.564011	7.28067	5.21159	6.81547	0	0.701317	0	8.08333
	L6	3.55872	5.09079	0	0.463742	7.28067	5.21159	6.81547	0	0.548238	0	19.8333
	L7	3.55872	5.09079	0	0.443151	7.28067	5.21159	5.96354	0	0.514418	0	23.8333
	L8	3.55872	4.24232	0	0.42077	7.28067	5.21159	5.96354	0	0.484158	0	28.3333
	L9	3.55872	4.24232	0	0.362578	7.28067	5.21159	5.96354	0	0.396938	0	47.3333
	L10	3.55872	3.39386	0	0.307968	7.28067	5.21159	5.96354	0	0.318619	0	77.3333
	L11	3.55872	3.39386	0	0.252462	7.28067	5.21159	5.1116	0	0.245639	0	121.833
	L12	3.55872	3.39386	0	0.225604	7.28067	5.21159	6.81547	0	0.1246	0	195.333
	L13	3.55872	1.69693	0	0.168308	7.28067	5.21159	4.25967	0	0.140619	0	288.833
	L14	3.55872	1.69693	0	0.159355	7.28067	5.21159	4.25967	0	0.129939	0	315.833
	L15	3.55872	1.69693	0	0.169203	7.28067	5.21159	5.1116	0	0.0640797	0	364.833
	L16	3.55872	1.69693	0	0.159355	7.28067	5.21159	4.25967	0	0.0516198	0	436.833
	L17	3.11388	1.69693	0	0.148612	7.28067	5.21159	4.25967	0	0.0391598	0	1006.33
	L18	3.11388	0.848464	0	0.115488	7.28067	5.21159	3.40774	0	0.01068	0	1292.33
	L19	3.11388	0.848464	0	0.10564	7.28067	5.21159	2.5558	0	-0.00355999	0	1320
	L20	3.11388	0.848464	0	0.102954	7.28067	5.21159	3.40774	0	-0.00711997	0	1364.33
	L21	3.11388	0.848464	0	0.100269	7.28067	5.21159	3.40774	0	-0.00889996	0	1508.33
	M0	8.45196	16.1208	15.7356	0	18.2017	10.4232	16.1867	19.6309	0.594518	15.2882	0	M	Multi TM
	M1	8.8968	16.9693	15.7356	0.961504	18.2017	10.4232	17.0387	19.6309	0.587398	16.0526	0	pH	7.5
	M2	8.8968	16.9693	15.7356	0.920322	19.1118	10.4232	17.0387	8.83392	0.580278	12.995	163.25	TM	1
	M3	8.8968	16.9693	15.7356	0.918532	19.1118	10.4232	17.0387	7.85238	0.580278	12.995	235.25	SiO2	40
	M4	8.8968	16.9693	15.7356	0.91316	18.2017	10.4232	17.0387	6.87083	0.580278	12.995	504.5
	M5	8.8968	16.9693	14.9489	0.903312	18.2017	10.4232	17.0387	6.87083	0.574938	12.995	674.25
	M6	9.34164	17.8177	16.5224	0.961504	20.0218	10.9443	17.8906	6.87083	0.639017	15.2882	912.25
	M7	8.8968	16.9693	14.9489	0.905998	18.2017	10.4232	17.0387	5.88928	0.592738	12.995	1247.25
	M8	8.8968	16.9693	14.9489	0.897941	18.2017	10.4232	17.0387	4.90773	0.589178	12.2305	1535.92
	Mf	8.00712	18.3936	14.1621	0.878245	17.2916	9.38086	15.3348	4.25967	0.711997	11.4661	1930.9
	N0	4.00356	7.63618	7.08104	-0.00358102	8.19075	4.69043	7.66741	8.83392	0.592738	7.64409	0	N	Multi TM
	N1	4.4484	8.48464	7.86782	0.975828	9.10084	5.21159	8.51934	9.81547	0.587398	8.4085	0	pH	7.5
	N2	4.4484	8.48464	7.86782	0.926589	9.10084	5.21159	8.51934	3.92619	0.582058	6.11527	163.25	TM	0.5
	N3	4.4484	8.48464	7.86782	0.933751	9.10084	5.21159	8.51934	3.92619	0.582058	6.11527	235.25	SiO2	40
	N4	4.4484	8.48464	7.86782	0.925694	9.10084	5.21159	8.51934	3.92619	0.582058	6.87968	504.5
	N5	4.4484	8.48464	7.86782	0.914056	9.10084	5.21159	8.51934	2.94464	0.576718	6.11527	674.25
	N6	4.4484	9.33311	7.86782	0.91137	9.10084	5.21159	8.51934	2.94464	0.582058	6.11527	912.25
	N7	4.4484	8.48464	7.86782	0.918532	9.10084	5.21159	8.51934	2.94464	0.592738	6.87968	1247.25
	N8	4.4484	8.48464	7.86782	0.921218	9.10084	5.21159	8.51934	2.94464	0.589178	6.87968	1535.92
	Nf	4.00356	10.2187	7.08104	0.890779	8.19075	4.69043	7.66741	1.70387	0.729797	6.11527	1930.9
	O0	8.45196	16.1208	15.7356	-0.00447628	18.2017	10.4232	16.1867	19.6309	2.04165	16.0526	0	O	Multi TM
	O1	8.8968	16.9693	15.7356	1.03223	19.1118	10.4232	17.8906	19.6309	2.01317	16.0526	0	pH	7.5
	O2	8.8968	16.9693	15.7356	0.910474	19.1118	10.4232	17.0387	5.88928	1.95621	12.2305	163.25	TM	1
	O3	8.8968	16.9693	15.7356	0.903312	19.1118	10.4232	17.0387	5.88928	1.93841	11.4661	235.25	SiO2	100
	O4	8.8968	16.9693	15.7356	0.909579	19.1118	10.4232	17.0387	4.90773	1.93485	11.4661	504.5
	O5	8.8968	16.9693	15.7356	0.897046	19.1118	10.4232	17.0387	3.92619	1.91527	11.4661	674.25
	O6	8.8968	16.9693	15.7356	0.888988	19.1118	10.4232	17.0387	3.92619	1.90103	10.7017	912.25
	O7	8.8968	16.9693	15.7356	0.893465	19.1118	10.4232	17.0387	3.92619	1.90459	10.7017	1247.25
	O8	8.8968	16.9693	15.7356	0.886303	19.1118	10.4232	17.0387	3.92619	1.89035	9.93732	1535.92
	Of	8.45196	18.3936	14.9489	0.874664	17.2916	9.90202	16.1867	2.5558	2.07903	9.17291	1980.9
	P0	4.00356	7.63618	7.08104	-0.00447628	8.19075	4.69043	7.66741	8.83392	2.04521	7.64409	0	P	Multi TM
	P1	4.00356	7.63618	7.08104	0.91	8.19075	4.69043	7.66741	8.83392	2.04521	7.64409	0	pH	7.5
	P2	4.4484	8.48464	7.86782	0.91316	9.10084	5.21159	8.51934	2.94464	1.96867	6.11527	163.25	TM	0.5
	P3	4.4484	8.48464	7.86782	0.91137	9.10084	5.21159	8.51934	2.94464	1.97579	6.11527	235.25	SiO2	100
	P4	4.4484	8.48464	7.86782	0.907789	9.10084	5.21159	8.51934	1.96309	1.95977	6.11527	504.5
	P5	4.4484	8.48464	7.86782	0.900627	9.10084	5.21159	8.51934	1.96309	1.93663	5.35086	674.25
	P6	4.4484	8.48464	7.86782	0.891674	9.10084	5.21159	8.51934	0.981547	1.91883	5.35086	912.25
	P7	4.4484	8.48464	7.86782	0.889884	9.10084	5.21159	8.51934	0.981547	1.91883	5.35086	1247.25
	P8	4.4484	8.48464	7.86782	0.887198	9.10084	5.21159	8.51934	0.981547	1.91349	6.11527	1535.92
	Pf	4.00356	9.19681	7.08104	0.844226	8.19075	4.69043	7.66741	0.851934	2.03987	4.58645	1998.8
	Q0	8.8968	16.9693	15.7356	-0.00358102	18.2017	10.4232	17.0387	19.6309	1.28693	16.0526	0	Q	Multi TM
	Q1	8.8968	16.9693	15.7356	-0.00358102	18.2017	10.4232	17.0387	19.6309	1.41153	16.0526	0	pH	8
	Q2	8.8968	16.9693	15.7356	0.999105	18.2017	10.4232	17	19.6309	1.39373	16.0526	0	TM	1
	Q3	8.8968	16.9693	15.7356	0.959714	18.2017	10.4232	17.0387	10.797	1.36881	9.93732	0.1	SiO2	85
	Q4	8.8968	16.9693	15.7356	0.952551	18.2017	10.4232	17.0387	6.87083	1.37593	8.4085	0.316667
	Q5	8.8968	16.9693	15.7356	0.94718	18.2017	10.4232	17	5.88928	1.36169	8.4085	0.666667
	Q6	8.8968	16.9693	15.7356	0.948075	18.2017	10.4232	17.0387	4.90773	1.36525	8.4085	1.16667
	Q7	8.8968	16.9693	15.7356	0.939123	18.2017	10.4232	17.0387	3.92619	1.35635	7.64409	1.83333
	Q8	8.8968	16.9693	15.7356	0.942704	18.2017	10.4232	17.0387	3.92619	1.35635	6.87968	2.71667
	Q9	8.8968	16.9693	15.7356	0.941808	18.2017	10.4232	17.0387	2.94464	1.35457	6.87968	3.83333
	Q10	8.8968	16.9693	15.7356	0.941808	18.2017	10.4232	17.0387	2.94464	1.35635	6.11527	6
	Q11	8.8968	16.9693	14.9489	0.921218	18.2017	10.4232	17.0387	1.96309	1.32965	4.58645	12.1667
	Q12	8.8968	16.1208	8.6546	0.884512	18.2017	10.4232	17	0.981547	1.27981	5.35086	24.1667
	Q13	8.8968	16.1208	4.72069	0.870188	18.2017	10.4232	17.0387	0.981547	1.25133	3.05764	29.6667
	Q14	8.45196	14.4239	0	0.70188	17.2916	10.4232	16.1867	0.981547	1.00036	2.29323	97.6667
	Q15	8.45196	13.5754	0	0.646374	17.2916	10.4232	15.3348	0.981547	0.929156	2.29323	124.167
	Q16	8.45196	13.5754	0	0.612355	17.2916	10.4232	15.3348	0.981547	0.881096	2.29323	148.167
	Q17	8.00712	11.8785	0	0.54342	17.2916	10.4232	14.4829	0.981547	0.774297	0.764409	197.167
	Q18	8.00712	11.03	0	0.474485	16.3815	9.90202	13.6309	0.981547	0.678177	1.52882	265.167
	Q19	8.00712	10.1816	0	0.42077	16.3815	9.90202	12.779	0.981547	0.605198	0.764409	337.667
	Q20	8.00712	9.33311	0	0.370636	16.3815	11.4655	11.9271	0	0.539338	1.52882	431.667
	Q21	8.00712	7.63618	0	0.338406	15.4714	9.90202	11.9271	0	0.512638	0.764409	533.167
	Q22	8.00712	6.78771	0	0.274843	15.4714	10.4232	10.2232	0	0.432538	0.764409	868.167
	Q23	7.56228	5.09079	0	0.240824	15.4714	10.4232	10.2232	0	0.382698	0.764409	1156.5
	Qf	7.11744	5.10934	0	0.184423	13.6513	9.90202	6.81547	0	0.448558	0.764409	1993.7
	R0	4.4484	8.48464	7.86782	-0.00358102	9.10084	5.21159	8.51934	9.81547	1.28337	8.4085	0	R	Multi TM
	R1	4.4484	8.48464	7.86782	-0.00358102	9.10084	5.21159	8.51934	9.81547	1.27803	7.64409	0	pH	8
	R2	4.4484	8.48464	7.86782	1.00627	9.10084	5.21159	8.51934	9.81547	1.27447	8.4085	0	TM	0.5
	R3	4.4484	8.48464	7.86782	0.974933	9.10084	5.21159	8.51934	6.87083	1.25133	6.11527	0.1	SiO2	85
	R4	4.4484	8.48464	7.86782	0.989257	9.10084	5.21159	8.51934	5.88928	1.26913	6.11527	0.316667
	R5	4.4484	8.48464	7.86782	0.9812	9.10084	5.21159	8.51934	4.90773	1.26201	5.35086	0.666667
	R6	4.4484	8.48464	7.86782	0.975828	9.10084	5.21159	8.51934	3.92619	1.26201	6.11527	1.16667
	R7	4.4484	8.48464	7.86782	0.978514	9.10084	5.21159	8.51934	2.94464	1.25845	5.35086	1.83333
	R8	4.4484	8.48464	7.86782	0.972247	9.10084	5.21159	8.51934	2.94464	1.25133	5.35086	2.71667
	R9	4.4484	8.48464	7.86782	0.977619	9.10084	5.21159	8.51934	2.94464	1.25845	4.58645	3.83333
	R10	4.4484	8.48464	7.86782	0.969561	9.10084	5.21159	8.51934	1.96309	1.25133	3.82205	6
	R11	4.4484	8.48464	7.86782	0.962399	9.10084	5.21159	8.51934	0.981547	1.23888	3.05764	12.1667
	R12	4.4484	8.48464	3.14713	0.918532	9.10084	5.21159	8.51934	0.981547	1.18548	3.82205	24.1667
	R13	4.4484	8.48464	1.57356	0.89615	9.10084	5.21159	8.51934	0.981547	1.1659	2.29323	29.6667
	R14	4.4484	7.63618	0	0.775291	9.10084	5.21159	8.51934	0.981547	0.978996	3.82205	97.6667
	R15	4.4484	6.78771	0	0.735004	9.10084	5.21159	8.51934	0.981547	0.925596	1.52882	124.167
	R16	4.4484	6.78771	0	0.704566	9.10084	5.21159	8.51934	0	0.881096	1.52882	148.167
	R17	4.00356	6.78771	0	0.645479	9.10084	5.21159	7.66741	0	0.799217	0.764409	197.167
	R18	4.00356	5.93925	0	0.595345	8.19075	5.21159	7.66741	0	0.724457	1.52882	265.167
	R19	4.00356	5.93925	0	0.556849	8.19075	5.21159	7.66741	0	0.672837	0.764409	337.667
	R20	4.00356	5.93925	0	0.512981	8.19075	5.21159	7.66741	0	0.614098	2.29323	431.667
	R21	4.00356	5.09079	0	0.485228	8.19075	5.21159	6.81547	0	0.598078	1.52882	533.167
	R22	4.00356	4.24232	0	0.405551	8.19075	5.21159	6.81547	0	0.477038	0.764409	868.167
	R23	4.00356	4.24232	0	0.351835	8.19075	5.21159	5.96354	0	0.423638	0.764409	1156.5
	Rf	3.55872	3.0656	0	0.267681	7.28067	4.69043	4.25967	0	0.448558	0.764409	1996.8
	S0	8.8968	16.9693	15.7356	-0.00447628	18.2017	10.4232	17.0387	19.6309	0.703097	15.2882	0	S	Multi TM
	S1	8.8968	16.9693	15.7356	-0.00447628	18.2017	10.4232	17.0387	19.6309	0.752937	16.0526	0	pH	8
	S2	8.8968	16.9693	15.7356	0.992838	18.2017	10.4232	17.0387	19.6309	0.752937	16.817	0	TM	1
	S3	8.8968	16.9693	15.7356	0.961504	18.2017	10.4232	17.0387	14.7232	0.747597	11.4661	0.1	SiO2	42
	S4	8.8968	17.8177	15.7356	0.970457	18.2017	10.4232	17.8906	11.7786	0.758277	11.4661	0.316667
	S5	8.8968	16.9693	15.7356	0.96598	18.2017	10.4232	17.0387	9.81547	0.751157	10.7017	0.666667
	S6	8.8968	16.9693	15.7356	0.959714	18.2017	10.4232	17.0387	8.83392	0.744037	10.7017	1.16667
	S7	8.8968	16.9693	15.7356	0.955237	18.2017	10.4232	17.0387	7.85238	0.744037	11.4661	1.83333
	S8	8.8968	16.9693	15.7356	0.952551	18.2017	10.4232	17.0387	6.87083	0.745817	9.93732	2.71667
	S9	8.8968	16.9693	15.7356	0.949866	18.2017	10.4232	17.0387	6.87083	0.736917	9.93732	3.83333
	S10	8.8968	16.9693	15.7356	0.949866	18.2017	10.4232	17.0387	5.88928	0.744037	9.17291	6
	S11	8.8968	16.9693	15.7356	0.956132	18.2017	10.4232	17.0387	4.90773	0.747597	9.93732	12.1667
	S12	8.8968	16.9693	14.1621	0.944494	18.2017	10.4232	17.0387	3.92619	0.735137	8.4085	24.1667
	S13	8.8968	16.9693	13.3753	0.94897	18.2017	10.4232	17.0387	3.92619	0.745817	9.93732	29.6667
	S14	8.8968	16.1208	4.72069	0.89436	18.2017	10.4232	17.0387	0.981547	0.688857	7.64409	97.6667
	S15	8.8968	15.2724	0	0.794091	18.2017	10.4232	16.1867	0	0.592738	4.58645	124.167
	S16	8.8968	14.4239	0	0.73769	18.2017	10.4232	15.3348	0	0.535778	3.05764	148.167
	S17	8.45196	13.5754	0	0.653536	17.2916	10.4232	14.4829	0	0.443218	2.29323	197.167
	S18	8.45196	11.8785	0	0.584602	17.2916	10.4232	13.6309	0	0.361339	1.52882	265.167
	S19	8.45196	11.8785	0	0.54521	17.2916	10.4232	13.6309	0	0.315059	1.52882	337.667
	S20	8.45196	11.03	0	0.503133	17.2916	9.90202	12.779	0	0.265219	1.52882	431.667
	S21	8.45196	10.1816	0	0.477171	17.2916	10.4232	11.9271	0	0.250979	1.52882	533.167
	S22	8.45196	8.48464	0	0.452104	17.2916	10.4232	11.0751	0	0.192239	1.52882	868.167
	S23	8.45196	7.63618	0	0.401074	17.2916	10.4232	10.2232	0	0.158419	0.764409	1156.5
	Sf	8.00712	8.17494	0	0.371531	16.3815	10.4232	8.51934	0	0.252759	2.29323	1998.5
	T0	4.4484	8.48464	7.86782	-0.00447628	9.10084	5.21159	8.51934	9.81547	0.703097	7.64409	0	T	Multi TM
	T1	4.4484	8.48464	7.86782	-0.00447628	9.10084	5.21159	8.51934	9.81547	0.710217	7.6	0	pH	8
	T2	4.4484	8.48464	7.86782	0.998209	9.10084	5.21159	8.51934	9.81547	0.715557	7.6	0	TM	0.5
	T3	4.4484	8.48464	7.08104	0.938227	9.10084	5.21159	8.51934	7.85238	0.672837	6.87968	0.1	SiO2	42
	T4	4.4484	8.48464	7.86782	0.945389	9.10084	5.21159	8.51934	6.87083	0.679957	6.11527	0.316667
	T5	4.4484	8.48464	7.08104	0.936437	9.10084	5.21159	8.51934	5.88928	0.669277	5.35086	0.666667
	T6	4.4484	8.48464	7.86782	0.938227	9.10084	5.21159	8.51934	5.88928	0.672837	6.11527	1.16667
	T7	4.4484	8.5	7.86782	0.936437	9.10084	5.21159	8.51934	5.88928	0.676397	5.35086	1.83333
	T8	4.4484	8.48464	7.86782	0.934646	9.10084	5.21159	8.51934	4.90773	0.672837	5.35086	2.71667
	T9	4.4484	8.48464	7.86782	0.935542	9.10084	5.21159	8.51934	4.90773	0.674617	5.35086	3.83333
	T10	4.4484	8.48464	7.86782	0.931961	9.10084	5.21159	8.51934	3.92619	0.667497	5.35086	6
	T11	4.4484	8.5	7.86782	0.933751	9.10084	5.21159	8.51934	3.92619	0.672837	5.35086	12.1667
	T12	4.4484	8.48464	7.86782	0.93017	9.10084	5.21159	8.51934	2.94464	0.667497	4.58645	24.1667
	T13	4.4484	8.48464	7.08104	0.931961	9.10084	5.21159	8.51934	2.94464	0.671057	4.6	29.6667
	T14	4.4484	8.48464	3.93391	0.923008	9.10084	5.21159	8.51934	0.981547	0.665717	4.58645	97.6667
	T15	4.4484	7.63618	0	0.827216	9.10084	5.21159	7.66741	0	0.582058	2.29323	124.167
	T16	4.4484	6.78771	0	0.784244	9.10084	5.21159	8.51934	0	0.533998	1.52882	148.167
	T17	4.4484	7.63618	0	0.735004	9.10084	5.21159	7.66741	0	0.475258	0.764409	197.167
	T18	4.4484	6.78771	0	0.693823	9.10084	5.21159	7.66741	0	0.421858	0.764409	265.167
	T19	4.00356	6.78771	0	0.647269	9.10084	5.21159	6.81547	0	0.366679	0.764409	337.667
	T20	4.00356	5.93925	0	0.61504	9.10084	5.21159	6.81547	0	0.320399	1.52882	431.667
	T21	4.4484	5.93925	0	0.612355	9.10084	5.73275	7.66741	0	0.336419	7.64409	533.167
	T22	4.00356	5.09079	0	0.533572	9.10084	5.21159	6.81547	0	0.245639	3.05764	868.167
	T23	4.00356	5.09079	0	0.499552	8.19075	5.21159	6.81547	0	0.208259	0.764409	1156.5
	Tf	3.55872	5.10934	0	0.426141	7.28067	4.69043	5.1116	0	0.270559	0.764409	1998.5
	U1	13.3452	24.6055	22.8167	0.00358102	26.3924	15.6348	24.7061	28.4649	0.697757	22.1679	0	U	Multi TM
	U2	12.9004	25.4539	22.8167	0.931961	26.3924	15.1136	24.7061	28.4649	0.703097	22.1679	0	pH	8.5
	U3	12.9004	24.6055	22.0299	0.87556	26.3924	15.1136	24.7061	6.87083	0.676397	5.35086	0.116667	TM	1.5
	U4	12.9004	24.6055	22.0299	0.870188	26.3924	15.6348	24.7061	3.92619	0.679957	5.35086	0.283333	SiO2	42
	U5	12.9004	24.6055	22.0299	0.869293	26.3924	15.1136	24.7061	1.96309	0.674617	5.35086	0.6
	U6	13.79	24.6055	23.6035	0.87735	28.2126	16.1559	25.558	0	0.710217	4.58645	1.45
	U7	12.4555	19.5147	0	0.634736	25.4823	15.1136	22.1503	0	0.510858	2.29323	3.25
	U8	12.9004	17.8177	0	0.567592	25.4823	15.1136	21.2983	0	0.444998	0.764409	5.76667
	U9	12.4555	16.9693	0	0.517457	25.4823	15.1136	20.4464	0	0.393378	1.52882	9.41667
	U10	12.0107	14.4239	0	0.429722	25.4823	15.1136	19.5945	0	0.299039	1.52882	22.25
	U11	12.4555	14.4239	0	0.412713	24.5723	15.1136	18.7425	0	0.281239	1.52882	25.9167
	U12	12.0107	13.5754	0	0.389436	24.5723	15.6348	17.8906	0	0.249199	1.52882	32.4167
	U13	12.0107	11.8785	0	0.342883	24.5723	15.1136	17.0387	0	0.206479	0.764409	47.3333
	U14	12.0107	11.8785	0	0.329454	24.5723	15.1136	17.0387	0	0.190459	0.764409	53.25
	U15	12.0107	10.1816	0	0.289167	23.6622	15.6348	16.1867	0	0.145959	0.764409	73.9167
	U16	12.0107	9.33311	0	0.260519	24.5723	15.6348	15.3348	0	0.1157	3.05764	98.6667
	U17	11.5658	8.48464	0	0.222919	23.6622	15.1136	13.6309	0	0.0711997	1.52882	130.25
	U18	11.5658	6.78771	0	0.182632	23.6622	15.6348	11.9271	0	0.0338199	0.764409	194.917
	U19	11.5658	5.93925	0	0.165622	22.7521	15.1136	11.0751	0	0.0213599	0.764409	242.417
	U20	11.5658	5.09079	0	0.146822	22.7521	15.1136	10.2232	0	0.00177999	1.52882	333.917
	U21	11.5658	5.09079	0	0.135184	22.7521	15.6348	8.51934	0	0	0.764409	434.417
	U22	11.5658	5.09079	0	0.119069	22.7521	15.6348	7.66741	0	0	0.764409	558.417
	U23	11.5658	4.24232	0	0.115488	22.7521	15.6348	7.66741	0	0	1.52882	722.417
	Uf	10.2313	4.08747	0	0.106535	20.0218	14.0713	5.96354	0	0.0961196	0.764409	837.9
	V1	6.6726	12.727	11.8017	0.00268577	13.6513	7.81739	12.779	14.7232	0.699537	11.4661	0	V	Multi TM
	V2	6.6726	12.727	11.8017	0.949866	15.4714	7.81739	12.779	14.7232	0.703097	12.2305	0	pH	8.5
	V3	6.6726	13.5754	11.8017	0.962399	14.5613	8.33854	13.6309	4.90773	0.754717	4.58645	0.116667	TM	0.75
	V4	6.6726	12.727	11.0149	0.905103	13.6513	7.81739	12.779	2.94464	0.687077	3.82205	0.283333	SiO2	42
	V5	6.6726	11.8785	11.0149	0.897046	13.6513	7.81739	12.779	0.981547	0.683517	3.05764	0.6
	V6	6.22776	11.8785	3.14713	0.803939	12.7412	7.81739	11.9271	0	0.624778	2.29323	1.45
	V7	6.22776	10.1816	0	0.716204	12.7412	7.81739	11.9271	0	0.541118	0.764409	3.25
	V8	6.22776	10.1816	0	0.664279	12.7412	7.81739	11.9271	0	0.493058	0.764409	5.76667
	V9	6.22776	9.33311	0	0.61504	12.7412	7.81739	11.0751	0	0.439658	1.52882	9.41667
	V10	5.78292	8.48464	0	0.527305	12.7412	7.81739	11.0751	0	0.334639	1.52882	22.25
	V11	5.78292	7.63618	0	0.508505	12.7412	7.81739	11.0751	0	0.311499	0.764409	25.9167
	V12	5.78292	7.63618	0	0.481647	12.7412	7.81739	11.0751	0	0.279459	0.764409	32.4167
	V13	6.22776	6.78771	0	0.430618	12.7412	7.81739	10.2232	0	0.224279	1.52882	47.3333
	V14	5.78292	6.78771	0	0.410922	12.7412	7.81739	10.2232	0	0.202919	0.764409	53.25
	V15	5.78292	5.93925	0	0.358102	11.8311	7.81739	9.37127	0	0.149519	0.764409	73.9167
	V16	5.78292	5.93925	0	0.323187	12.7412	7.81739	9.37127	0	0.11392	1.52882	98.6667
	V17	5.78292	4.24232	0	0.271262	11.8311	7.29623	7.66741	0	0.0640797	0.764409	130.25
	V18	5.78292	4.24232	0	0.222023	11.8311	7.81739	6.81547	0	0.0231399	0.764409	194.917
	V19	5.78292	4.24232	0	0.202328	11.8311	7.81739	6.81547	0	0.00177999	0.764409	242.417
	V20	5.78292	3.39386	0	0.179051	11.8311	7.81739	5.96354	0	0	1.52882	333.917
	V21	5.33808	3.39386	0	0.163832	11.8311	7.81739	5.1116	0	0	0.764409	434.417
	V22	5.33808	2.54539	0	0.150403	10.921	7.81739	5.1116	0	0	0.764409	558.417
	V23	5.33808	2.54539	0	0.140555	10.921	7.81739	4.25967	0	0	0.764409	722.417
	Vf	4.89324	3.0656	0.786782	0.135184	10.0109	7.29623	4.25967	0	0.0854397	1.52882	837.9
	W1	8.8968	16.1208	11.8017	0.00179051	17.2916	10.4232	17.0387	19.6309	1.73371	3.82205	0	W	Multi TM
	W2	8.8968	16.9693	14.1621	0.929275	18.2017	10.4232	17.0387	19.6309	1.77999	12.995	0	pH	8.5
	W3	8.45196	16.1208	11.8017	0.871083	17.2916	10.4232	16.1867	1.96309	1.67675	1.52882	0.116667	TM	1
	W4	8.45196	15.2724	11.8017	0.846016	17.2916	10.4232	16.1867	0.981547	1.65005	0.764409	0.283333	SiO2	107
	W5	8.45196	15.2724	11.8017	0.806625	17.2916	9.90202	16.1867	0	1.59487	0.764409	0.6
	W6	8.00712	14.4239	7.86782	0.739481	16.3815	9.90202	16.1867	0	1.50943	0.764409	1.45
	W7	8.00712	13.5754	1.57356	0.652641	16.3815	10.4232	16.1867	0	1.39551	1.52882	3.25
	W8	8.00712	12.727	0.786782	0.584602	16.3815	10.4232	15.3348	0	1.28337	0.764409	5.76667
	W9	7.56228	11.8785	0.786782	0.52641	15.4714	9.90202	15.3348	0	1.18904	0.764409	9.41667
	W10	7.56228	10.1816	0	0.426141	15.4714	10.4232	14.4829	0	1.01816	0.764409	22.25
	W11	7.11744	10.1816	0	0.401074	15.4714	10.4232	14.4829	0	0.973656	0.764409	25.9167
	W12	7.56228	10.1816	0	0.379588	15.4714	10.4232	14.4829	0	0.955856	0.764409	32.4167
	W13	7.11744	8.48464	0	0.324978	14.5613	10.4232	13.6309	0	0.852617	1.52882	47.3333
	W14	7.11744	8.48464	0	0.308863	14.5613	10.4232	13.6309	0	0.825917	0.764409	53.25
	W15	6.6726	7.63618	0	0.260519	13.6513	10.4232	12.779	0	0.745817	1.52882	73.9167
	W16	6.6726	6.78771	0	0.225604	13.6513	10.4232	11.9271	0	0.685297	0.764409	98.6667
	W17	6.6726	5.93925	0	0.19427	13.6513	10.4232	11.9271	0	0.628337	1.52882	130.25
	W18	6.22776	4.24232	0	0.146822	12.7412	10.4232	10.2232	0	0.548238	0.764409	194.917
	W19	6.22776	4.24232	0	0.126231	11.8311	10.4232	10.2232	0	0.517978	0.764409	242.417
	W20	5.78292	3.39386	0	0.102059	11.8311	10.4232	9.37127	0	0.471698	0.764409	333.917
	W21	5.78292	2.54539	0	0.0850492	10.921	10.4232	8.51934	0	0.437878	0.764409	434.417
	W22	5.78292	1.69693	0	0.0725157	10.921	10.4232	7.66741	0	0.411178	0.764409	558.417
	W23	5.33808	1.69693	0	0.0617726	10.921	10.4232	6.81547	0	0.386258	0.764409	722.417
	Wf	4.4484	1.02187	0	0.0429722	8.19075	9.38086	4.25967	0	0.444998	0.764409	1034.9
	X1	4.89324	7.63618	7.08104	0.0581916	9.10084	5.73275	9.37127	9.81547	1.92239	10.7017	0	X	Multi TM
	X2	4.4484	7.63618	7.08104	0.968666	9.10084	5.21159	8.51934	9.81547	1.96155	7.64409	0	pH	8.5
	X3	4.00356	6.78771	6.29426	0.898836	8.19075	5.21159	8.51934	0	1.83695	0.764409	0.116667	TM	0.5
	X4	4.00356	6.78771	6.29426	0.85855	8.19075	5.21159	8.51934	0	1.81025	0.764409	0.283333	SiO2	117.6
	X5	4.00356	6.78771	6.29426	0.811996	8.19075	5.21159	7.66741	0	1.73193	1.52882	0.6
	X6	4.00356	5.93925	3.93391	0.738585	8.19075	5.21159	8.51934	0	1.64649	0.764409	1.45
	X7	4.00356	5.93925	0.786782	0.635631	7.28067	5.21159	8.51934	0	1.48273	0.764409
	X8	4.00356	5.09079	0.786782	0.566697	7.28067	5.21159	7.66741	0	1.37237	0.764409
	X9	3.55872	5.09079	0	0.500448	7.28067	5.21159	7.66741	0	1.25489	0.764409	9.41667
	X10	3.55872	4.24232	0	0.393912	7.28067	5.21159	7.66741	0	1.08224	0.764409	22.25
	X11	3.55872	4.24232	0	0.378693	7.28067	5.21159	6.81547	0	1.05376	0.764409	25.9167
	X12	3.55872	4.24232	0	0.347359	7.28067	5.21159	6.81547	0	1.00214	1.52882	32.4167
	X13	3.11388	4.24232	0	0.296329	7.28067	5.21159	6.81547	0	0.920256	0.764409	47.3333
	X14	3.11388	3.39386	0	0.278424	6.37059	5.21159	6.81547	0	0.888216	0.764409	53.25
	X15	3.11388	3.39386	0	0.234557	6.37059	5.21159	6.81547	0	0.841937	0.764409	73.9167
	X16	3.11388	3.39386	0	0.195166	6.37059	5.21159	5.96354	0	0.797437	0.764409	98.6667
	X17	3.11388	2.54539	0	0.164727	6.37059	5.21159	5.96354	0	0.777857	2.29323	130.25
	X18	2.66904	1.69693	0	0.120859	5.4605	5.21159	5.96354	0	0.692417	1.52882	194.917
	X19	2.66904	1.69693	0	0.101164	5.4605	5.21159	5.1116	0	0.642577	0.764409	242.417
	X20	2.66904	1.69693	0	0.080573	4.55042	5.21159	5.1116	0	0.598078	0.764409	333.917
	X21	2.66904	0.848464	0	0.0680394	4.55042	5.21159	4.25967	0	0.562478	0.764409	434.417
	X22	2.2242	0.848464	0	0.0564011	4.55042	5.21159	4.25967	0	0.533998	0.764409	558.417
	X23	2.2242	0.848464	0	0.0501343	4.55042	5.21159	3.40774	0	0.500178	0.764409	722.417
	Xf	1.77936	1.02187	0	0.0331244	3.64033	4.69043	1.70387	0	0.535778	0.764409	1106.9
	Y0	0	0	0	0.00716204	0	0	0	0	0.507298	2.29323	0
	Y1	0	0	0	0.925694	0	0	0	0	0.503738	0.764409	0	Y	TM free
	Y2	0	0	0	0.822739	0	0	0	0	0.462798	0.764409	0.0833333	pH	8.5
	Y3	0	0	0	0.806625	0	1.56348	0	0	0.459238	0.764409	0.25	TM	0
	Y4	0	0	0	0.778872	0	0	0	0	0.441438	0.764409	0.583333	SiO2	30
	Y5	0	0	0	0.744852	0	0	0	0	0.421858	0.764409	1.51667
	Y6	0	0	0	0.65085	0	0	0	0	0.348879	0.764409	6.91667
	Y7	0	0	0	0.568487	0	0	0	0	0.261659	0.764409	21.75
	Y8	0	0	0	0.486124	0	0	0	0	0.170879	0.764409	46.9167
	Y9	0	0	0	0.440466	0	0	0	0	0.128159	0.764409	76.45
	Y10	0	0	0	0.410027	0	0	0	0	0.10146	0.764409	100.55
	Y11	0	0	0	0.376902	0	0	0	0	0.0676397	0.764409	166.55
	Y12	0	0	0	0.36795	0	0	0	0	0.0605198	0.764409	208.717
	Y13	0	0	0	0.365264	0	0	0	0	0.0516198	0.764409	265.05
	Y14	0	0	0	0.337511	0	0	0	0	0	0.764409	416.05
	Y15	0	0	0	0.339302	0	0	0	0	0	0.764409	483.717
	Z0	0	0	0	0.00626679	0	0	0	0	0.514418	0.764409	0	Z	TM Free
	Z1	0	0	0	0.949866	0	0	0	0	0.512638	0.764409	0	pH	8.5
	Z2	0	0	0	0.850492	0	0	0	0	0.494838	2.29323	0.0833333	TM	0
	Z3	0	0	0	0.799463	0	0	0	0	0.459238	0.764409	0.25	SiO2	30
	Z4	0	0	0	0.761862	0	0	0	0	0.443218	0.764409	0.583333
	Z5	0	0	0	0.733214	0	0	0	0	0.427198	0.764409	1.51667
	Z6	0	0	0	0.644584	0	0	0	0	0.352439	0.764409	6.91667
	Z7	0	0	0	0.555058	0	0	0	0	0.259879	0.764409	21.75
	Z8	0	0	0	0.476276	0	0	0	0	0.179779	0.764409	46.9167
	Z9	0	0	0	0.425246	0	0	0	0	0.126379	0.764409	76.45
	Z10	0	0	0	0.401074	0	0	0	0	0.0978996	0.764409	100.55
	Z11	0	0	0	0.363474	0	0	0	0	0.0694197	0.764409	166.55
	Z12	0	0	0	0.35094	0	0	0	0	0.0605198	0.764409	208.717
	Z13	0	0	0	0.35094	0	0	0	0	0.0569598	0	265.05
	Z14	0	0	0	0.466428	0	0	0	0	0	2.29323	416.05
	Z15	0	0	0	0.317816	1.82017	0	0	0	0	1.52882	465.05
	AA0	0	0	0	0.00537153	0	0	15.3348	0	0.493058	0.764409	0	AA	Ni only
	AA1	0	0	0	0.922113	0	0	15.3348	0	0.496618	0.764409	0	pH	8.5
	AA2	0	0	0	0.809311	0	0	15.3348	0	0.469918	0.764409	0.0833333	TM	1
	AA3	0	0	0	0.79051	0	0	15.3348	0	0.450338	0.764409	0.25	SiO2	30
	AA4	0	0	0	0.768129	0	0	14.4829	0	0.439658	0.764409	0.583333
	AA5	0	0	0	0.735004	0	0	14.4829	0	0.425418	0.764409	1.51667
	AA6	0	0	0	0.657117	0	0	13.6309	0	0.373799	0.764409	6.91667
	AA7	0	0	0	0.588183	0	0	11.9271	0	0.306159	0.764409	21.75
	AA8	0	0	0	0.516562	0	0	11.0751	0	0.229619	0.764409	46.9167
	AA9	0	0	0	0.455685	0	0	9.37127	0	0.163759	0.764409	76.45
	AA10	0	0	0	0.42256	0	0	8.51934	0	0.137059	0.764409	100.55
	AA11	0	0	0	0.376902	0	0	7.66741	0	0.0978996	0.764409	166.55
	AA12	0	0	0	0.365264	0	0	7.66741	0	0.0747597	0.764409	208.717
	AA13	0	0	0		0	0		0		0	265.05
	AA14	0	0	0	0.355416	0	0	6.81547	0	0	1.52882	416.05
	AA15	0	0	0	0.31692	0	0	5.1116	0	0	0	555.55
	AA16	0	0	0	0.306177	0	0	5.1116	0	0	0	729.217
	AA17	0	0	0	0.299015	0	0	5.1116	0	0	0	894.217
	AA18	0	0	0	0.294539	0	0	4.25967	0	0	0	1255.22
	AA19	0	0	0	0.297225	0	0	4.25967	0	0	1.52882	1683.22
	AAf	0	0	0	0.0639355	0	0	0.962685	0	0	0	2407.82
	AB0	8.45196	0	0	0.00537153	0	0	0	0	0.498398	0.764409	0	AB	Cd only
	AB1	8.00712	0	0	0.976723	0	0	0	0	0.489498	0.764409	0	pH	8.5
	AB2	8.00712	0	0	0.812892	0	0	0	0	0.464578	0.764409	0.0833333	TM	1
	AB3	8.00712	0	0	0.802149	0	0	0	0	0.455678	0.764409	0.25	SiO2	30
	AB4	8.00712	0	0	0.774396	0	0	0	0	0.434318	0.764409	0.583333
	AB5	8.00712	0	0	0.751119	0	0	0	0	0.432538	0.764409	1.51667
	AB6	8.00712	0	0	0.670546	0	0	0	0	0.370239	0.764409	6.91667
	AB7	8.00712	0	0	0.598926	0	0	0	0	0.311499	0.764409	21.75
	AB8	7.56228	0	0	0.529991	0	0	0	0	0.227839	0.764409	46.9167
	AB9	7.56228	0	0	0.47538	0	0	0	0	0.165539	0.764409	76.45
	AB10	7.56228	0	0	0.443151	0	0	0	0	0.126379	0.764409	100.55
	AB11	7.56228	0	0	0.392122	0	0	0	0	0.0907796	0.764409	166.55
	AB12	7.56228	0	0	0.378693	0	0	0	0	0.0747597	0.764409	208.717
	AB13	7.56228	0	0	0.36974	0	0	0	0	0.0694197	0.764409	265.05
	AB14	8.00712	0	0	0.353626	0	0	0	0	0	0.764409	416.05
	AB15	7.56228	0	0	0.340197	0	0	0	0	0	0.764409	555.55
	AB16	8.00712	0	3.94073	0.33214	0	0	0	0	0	3.05764	729.217
	AB17	7.56228	0	0	0.327663	0	0	0	0	0	0.764409	894.217
	AB18	7.56228	0	0	0.318711	0	0	0	0	0	0.764409	1255.22
	AB19	7.56228	0	0	0.31692	0.910084	0	0	0	0	0.764409	1683.22
	AB20	7.56228	0	0	0.29991	0	0	0	0	0	0.764409	2403.22
	ABf	7.56228	0	0	0.306177	0	0	0	0	0.0142399	0.764409	2597.97
	AC0	0	0	14.9748	0.00179051	0	0	0	0	0.728017	0.764409	0	AC	Cu only
	AC1	0	0	15.7629	0.946285	0	0	0	0	0.738697	1.52882	0	pH	8.5
	AC2	0	0	8.66961	0.774396	0	0	0	0	0.651477	0.764409	0.0333333	TM	1
	AC3	0	0	0	0.738585	0	0	0	0	0.637237	0.764409	0.15	SiO2	42
	AC4	0	0	0	0.717099	0	0	0	0	0.630117	1.52882	0.316667
	AC5	0	0	0	0.687556	0	0	0	0	0.601638	0.764409	0.65
	AC6	0	0	0	0.64906	0	0	0	0	0.541118	0	1.65
	AC7	0	0	0	0.605192	0	0	0	0	0.525098	0.764409	2
	AC8	0	0	0	0.510295	0	0	0	0	0.396938	3.05764	23.6167
	AC9	0	0	0	0.377798	0	0	0	0	0.236739	0	54.7833
	AC10	0	0	0	0.225604	0	0	0	0	0	0.764409	228.367
	AC11	0	0	0	0.15667	0	0	0	0	0	0	393.367
	AC12	0	0	0	0.126231	0	0	0	0	0	0.764409	754.367
	AC13	0	0	0	0.13966	0	0	0	0	0	0.764409	1182.37
	ACf	0	0	0	0.128917	0	0	0	0	0	0	1925.87
	AD0	0	0	0	0.0196956	0	0	0	0	0.740477	16.0526	0	AD	Zn only
	AD1	0	0	0	0.963295	0	0	0	0	0.740477	15.2882	0	pH	8.5
	AD2	0	0	0	0.887198	0	0	0	0	0.692417	3.05764	0.0333333	TM	1
	AD3	0	0	0	0.863921	0	0	0	0	0.678177	4.58645	0.166667	SiO2	42
	AD4	0	0	0	0.85855	0	0	0	0	0.672837	3.82205	0.333333
	AD5	0	0	0	0.848702	0	0	0	0	0.669277	5.35086	0.666667
	AD6	0	0	0	0.794987	0	0	0	0	0.624778	2.29323	1.66667
	AD7	0	0	0	0.73769	0	0	0	0	0.574938	1.52882	1.9
	AD8	0	0	0	0.50761	0	0	0	0	0.400498	0.764409	23.5167
	AD9	0	0	0	0.391226	0	0	0	0	0.311499	0	54.6833
	AD10	0	0	0	0.138765	0	0	0	0	0.128159	0	228.267
	AD11	0	0	0	0.087735	0	0	0	0	0.1157	0	393.267
	AD12	0	0	0	0.0626679	0	0	0	0	0.10146	0	754.367
	AD13	0	0	0	0.0590868	0	0	0	0	0.0961196	0	1182.27
	ADf	0	0	0	0.0528201	0	0	0	0	0.0836597	0	1928.77
	AE0	0	0	0	0	0	0	0	18.6494	0.496618	0	0	AE	V only
	AE1	0	0	0	0.907789	0	0	0.851934	18.6494	0.489498	0.764409	0	pH	8.5
	AE2	0	0	0	0.772605	0	0	0	0	0.462798	0.764409	0.0333333	TM	1
	AE3	0	0	0	0.7735	0	0	0	0	0.478818	0.764409	0.15	SiO2	29.4
	AE4	0	0	0	0.757386	0	0	0.851934	0	0.475258	1.52882	0.316667
	AE5	0	0	0	0.719785	0	0	0	0	0.444998	0.764409	0.65
	AE6	0	0.848464	0	0.663384	0	0	0	0	0.407618	0.764409	1.65
	AE7	0	0	2.36444	0.622202	0	0	0	0	0.377358	2.29323	1.8
	AE8	0	0	0	0.482543	0	0	0	0	0.240299	1.52882	23.4167
	AE9	0	0	0	0.394808	0	0	0	0	0.161979	0.764409	54.5833
	AE10	0	0	0	0.256043	0	0	0	0	0	0	228.167
	AE11	0	0	0	0.254252	0	0	0	0	0	0.764409	393.167
	AE12	0	0	0	0.22829	0	0	0	0	0	0.764409	754.367
	AE13	0	0	0	0.230976	0	0	0	0	0	1.52882	1182.17
	AEf	0	0	0	0.214861	0	0	0	0	0	0	1933.17
	AF0	0	0	0	0.0196956	0	0	0	0	0.546458	0.764409	0	AF	Co only
	AF1	0	16.1208	0	0.999105	0	0	0	0	0.550018	0.764409	0	pH	8.5
	AF2	0	16.1208	0	0.884512	0	0	0	0	0.514418	0.764409	0.0333333	TM	1
	AF3	0	15.2724	0	0.856759	0	0	0	0	0.503738	0.764409	0.15	SiO2	36
	AF4	0	15.2724	0	0.84333	0	0	0	0	0.493058	0.764409	0.316667
	AF5	0	15.2724	0	0.828111	0	0	0	0	0.482378	0.764409	0.65
	AF6	0	14.4239	0	0.780662	0	0	0	0	0.444998	0.764409	1.65
	AF7	0	13.5754	0	0.741271	0	0	0	0	0.409398	0.764409	3.3
	AF8	0	11.03	0	0.565801	0	0	0	0	0.222499	0.764409	23.2167
	AF9	0	10.1816	0	0.487019	0	0	0	0	0.1246	0	54.3833
	AF10	0	5.93925	0	0.340197	0	0	0	0	0	2.29323	227.967
	AF11	0	5.93925	0	0.322292	0	0	0	0	0	1.52882	392.967
	AF12	0	5.09079	0	0.270367	0.910084	0	0	0	0	0.764409	754.367
	AF13	0	5.09079	0	0.309758	0	0	0	0	0	1.52882	1182.17
	AF14	0	5.09079	0	0.295434	0	0	0	0	0	0	1929.17
	AFf	0	5.09079	0	0.29812	0	0	0	0	0.00889996	0	2126.5
	AG0	0	0	0	0	17.2916	0	0	0	1.05198	0	0	AG	Mn only
	AG1	0	0	1.57629	0	14.5613	0	0	0	0.991456	1.52882	0	pH	8.5
	AG2	0	0	0	0.897046	16.3815	0	0	0	1.14276	0.764409	0	TM	1
	AG3	0	0	0	0.818263	14.5613	0	0	0	0.932716	0	0.0833333	SiO2	66
	AG4	0	0	0	0.78872	14.5613	0	0	0	0.897116	1.52882	0.25
	AG5	0	0	0	0.717995	14.5613	0	0	0	0.817017	0	0.75
	AG6	0	0	0	0.691137	14.5613	0	0	0	0.772517	0.764409	1.78333
	AG7	0	0	0	0.605192	13.6513	0	0	0	0.644357	0.764409	3.31667
	AG8	0	0	0	0.484333	13.6513	0	0	0	0.493058	0	7.45
	AG9	0	0	0	0.350045	13.6513	0	0	0	0.316839	0.764409	22.7833
	AG10	0	0	0	0.310654	12.7412	0	0	0	0.274119	0	31.7333
	AG11	0	0	0	0.268577	12.7412	0	0	0	0.229619	0.764409	47.05
	AG12	0	0	0	0.229185	12.7412	0	0	0	0.190459	0	78.8667
	AG13	0	0	0	0.180842	12.7412	0	0	0	0.161979	0.764409	102.033
	AG14	0	0	0	0.121755	11.8311	0	0	0	0.1246	0.764409	174.7
	AG15	0	0	0	0.100269	11.8311	0	0	0	0.11392	0	246.95
	AG16	0	0	0	0.0778872	10.921	0	0	0	0.10502	0.764409	387.2
	AG17	0	0	2.36444	0.0662489	11.8311	0	0	0	0.10324	2.29323	673.45
	AG18	0	0	0	0.0501343	10.921	0	0	0	0.0961196	0.764409	1182.95
	AGf	0	0	0	0.0438675	10.921	0	0	0	0.0889996	0.764409	1729.45
	AI0	0	0	0	0	0	0	0	0	0.964756	0	0	AI	TM free
	AI1	0	0	0	0	0	0	0	0	0.971876	0.764409	0	pH	8.5
	AI2	0	0	0	0.907789	0	0	0	0	0.962976	0.764409	0	TM	0
	AI3	0	0	0	0.883617	0	0	0	0	0.939836	0.764409	0.0833333	SiO2	60
	AI4	0	0	0	0.867502	0	0	0	0	0.925596	0.764409	0.416667
	AI5	0	0	0	0.765443	0	0	0	0	0.797437	0	2.48333
	AI6	0	0	2.36444	0.629364	0	0	0	0	0.608758	1.52882	8.43333
	AI7	0	0	0	0.503133	0	0	0	0	0.436098	0.764409	23.65
	AI8	0	0	0	0.42256	0	0	0	0	0.332859	0	55.5333
	AI9	0	0	0	0.376902	0	0	0	0	0.274119	0.764409	78.3667
	AI10	0	0	0	0.342883	0	0	0	0	0.218939	0	151.117
	AI11	0	0	0	0.261415	0	0	0	0	0.144179	0	223.283
	AI12	0	0	0	0.229185	0	0	0	0	0.11036	0.764409	363.533
	AI13	0	0	0	0.196061	0	0	0	0	0.0800997	0.764409	649.283
	AIf	0	0	0	0.185318	0	0	0	0	0.0818797	0.764409	889.283
	AJ0	0	0	0	0.000895255	0	0	0	0	1.01104	0	0	AJ	TM free
	AJ1	0	0	0	0.000895255	0	0	0	0	1.05732	0.764409	0	pH	8.5
	AJ2	0	0	0	1.11638	0	0	0	0	1.08224	0.764409	0	TM	0
	AJ3	0	0	0	0.991047	0	0	0	0	0.993236	0	0.0833333	SiO2	60
	AJ4	0	0	0	0.844226	0	0	0	0	0.966536	0	0.416667
	AJ5	0	0	0	0.709042	0	0	0	0	0.792097	0	2.48333
	AJ6	0	0	0	0.551477	0	0	0	0	0.566038	0.764409	8.43333
	AJ7	0	0	0	0.428827	0	0	0	0	0.400498	0	23.65
	AJ8	0	0	0	0.351835	0	0	0	0	0.306159	0	55.5333
	AJ9	0	0	0	0.299015	0	0	0	0	0.242079	0	78.3667
	AJ10	0	0	0	0.2265	0	0	0	0	0.160199	0.764409	151.117
	AJ11	0	0	0	0.191585	0	0	0	0	0.126379	0	223.283
	AJ12	0	0	0	0.159355	0	0	0	0	0.0961196	0	363.533
	AJ13	0	0	0	0.137869	0	0	0	0	0.0783197	0.764409	649.283
	AJf	0	0	0	0.127126	0	0	0	0	0.0836597	0.764409	889.3
